1 **Role of the atmospheric pollution in the Covid-19 outbreak risk in Italy**

2 *Daniele Fattorini and Francesco Regoli\**

3 *Dipartimento di Scienze della Vita e dell'Ambiente (Disva), Università Politecnica delle Marche*  
4 *(Univpm), Via Brecce Bianche, 60100, Ancona, Italy.*

5 *\*Author for correspondence Prof. Francesco Regoli, e-mail [f.regoli@staff.univpm.it](mailto:f.regoli@staff.univpm.it)*

## 6 **Abstract**

7 *Background:* After the initial outbreak in China, the diffusion in Italy of SARS-CoV-2 is exhibiting a  
8 clear regional trend with Northern areas being the most affected in terms of both frequency and  
9 severity of cases. Among multiple factors possibly involved in such geographical differences, a role  
10 has been hypothesized for atmospheric pollution.

11 *Objectives:* We provide additional evidence on the possible influence of air quality, particularly in  
12 terms of chronicity of exposure on the spread viral infection in Italian regions.

13 *Methods:* Actual data on to COVID-19 outbreak in Italian provinces and corresponding long-term air  
14 quality evaluations, were obtained from Italian and European agencies, elaborated and tested for  
15 possible interactions.

16 *Discussion:* Our elaborations reveal that, beside concentrations, the chronicity of exposure may  
17 influence the anomalous variability of SARS-CoV-2 in Italy. Data on distribution of atmospheric  
18 pollutants (NO<sub>2</sub>, O<sub>3</sub>, PM<sub>2.5</sub> and PM<sub>10</sub>) in Italian regions during the last 4 years, days exceeding  
19 regulatory limits, and years of the last decade (2010-2019) in which the limits have been exceeded  
20 for at least 35 days, confirmed that Northern Italy has been constantly exposed to chronic air  
21 pollution. Long-term air-quality data significantly correlated with cases of Covid-19 in up to 71 Italian  
22 provinces (updated 6 April) providing further evidence that chronic exposure to atmospheric  
23 contamination may represent a favourable context for the spread of the virus. Pro-inflammatory  
24 responses and high incidence of respiratory and cardiac affections are well known, while the  
25 capability of this coronavirus to bind particulate matters remains to be established. Atmospheric  
26 and environmental pollution should be considered as part of an integrated approach for sustainable  
27 development, human health protection and prevention of epidemic spreads.

28 **Keywords:** *COVID-19; Atmospheric Pollution; Pandemic risk; Italy*

29 **Main Text**

30 In December 2019, several pneumonia cases were suddenly observed in the metropolitan city  
31 of Wuhan (China), as the result of infection to a novel coronavirus (Li et al., 2020; Wu et al., 2020;  
32 Xu et al., 2020). This virus was termed SARS-CoV-2 for its similarity with that responsible of the  
33 global epidemic Severe Acute Respiratory Syndrome (SARS) occurred between 2002 and 2003 (Xu  
34 et al., 2020). Patients affected by SARS-CoV-2 infection often experienced serious complications,  
35 including organ failure, septic shock, pulmonary oedema, severe pneumonia and acute respiratory  
36 stress syndrome which in several cases were fatal (Chen et al., 2020; Sohrabi et al., 2020). The most  
37 severe symptoms, requiring intensive care recovery, were generally observed in older individuals  
38 with previous comorbidities, such as cardiovascular, endocrine, digestive and respiratory diseases  
39 (Sohrabi et al., 2020; Wang D. et al., 2020). The World Health Organization (WHO) has defined this  
40 new syndrome with the acronym COVID-19 for Corona Virus Disease 2019 (Sohrabi et al., 2020;  
41 WHO, 2020a).

42 The drastic containment measures adopted by Chinese government did not prevent the  
43 diffusion of SARS-CoV-2, which in a few weeks has spread globally. Italy was the first country in  
44 Europe to be affected by the epidemic COVID-19, with an outbreak even larger than that originally  
45 observed in China (Fanelli and Piazza, 2020; Remuzzi and Remuzzi, 2020). Other European countries  
46 and United States rapidly registered an exponential growth of clinical cases, leading to restrictions  
47 and a global lockdown with evident social and economic repercussions (Cohen and Kupferschmidt,  
48 2020; ECDC, 2020). The WHO has recently declared the pandemic state of COVID-19 with over 1.3  
49 million of cases reported and over 74.000 victims worldwide (Cucinotta and Vanelli, 2020; WHO,  
50 2020b).

51 The ongoing epidemic trend in Italy immediately showed strong regional differences in the  
52 spread of infections, with most cases concentrated in the north of the country (Remuzzi and  
53 Remuzzi, 2020). The distribution of positive cases from February 24<sup>th</sup> to April 6<sup>th</sup>, is summarized in  
54 Figure 1A with a scale between 50 and 5000 cases (Figure 1A): these values have been exceeded in  
55 some areas of Lombardy and Piedmont, e.g. 11230 at Milan, 9712 at Bergamo, 9340 at Brescia,  
56 5985 at Turin (data re-elaborated from the official daily reports of the Department of Civil  
57 Protection, ICPD, 2020). Also, the relative percentage distribution of the positive test rate (Figure  
58 1B) clearly exhibit higher values in Northern Italy despite a certain uncertainty of data due to the  
59 different numbers and frequency of oropharyngeal swabs performed in various regions to test

60 coronavirus positivity. Mortality rate ranged from 18% in the most affected regions to less than 5%  
61 in the others (Figure 1C), further corroborating significantly greater effects in Northern Italy, both  
62 in terms of number of infections and the severity of cases (mortality).

63 To explain such geographical trend, it was initially assumed that restrictions decided by  
64 government authorities after the first outbreak in Lombardy, had contained the effects of the  
65 infection, preventing its rapid spread to the rest of the country. Some authors, however, from the  
66 clinical course of a large cohort of patients, have concluded that the epidemic coronavirus had been  
67 circulating in Italy for several weeks before the first recognized outbreak (Cerada et al., 2020). In  
68 this respect, the differentiated occurrence of infection cannot be fully explained by the containment  
69 actions; also, the elevated mortality rate in Northern Italy suggests that other factors are involved  
70 in the diffusion of infection and mortality rates.

71 Since the presence of comorbidities appeared determinant for the aetiology and severity of  
72 the COVID-19 symptoms (Chen et al., 2020; Wang T. et al., 2020; Wu et al., 2020), the role of  
73 atmospheric pollution in contributing to the high levels of SARS-CoV-2 lethality in Northern Italy has  
74 been hypothesized (Conticini et al., 2020). The adverse effects of air pollutants on human health are  
75 widely recognized in scientific literature, depending on various susceptibility factors such as age,  
76 nutritional status and predisposing conditions (Kampa and Castanas, 2008). Chronic exposure to the  
77 atmospheric pollution contributes to increased hospitalizations and mortality, primarily affecting  
78 cardiovascular and respiratory systems, causing various diseases and pathologies including cancer  
79 (Brunekreef and Holgate, 2002; Kampa and Castanas, 2008). Among air pollutants, the current focus  
80 is mainly given on nitrogen dioxide (NO<sub>2</sub>), particulate matter (PM<sub>2.5</sub> and PM<sub>10</sub>) and ozone (O<sub>3</sub>),  
81 frequently occurring at elevated concentrations in large areas of the planet.

82 The percentage of European population exposed to levels higher than the regulatory limits  
83 is about 7-8% for NO<sub>2</sub>, 6-8% for PM<sub>2.5</sub>, 13-19% for PM<sub>10</sub> and 12-29% for O<sub>3</sub> (EEA, 2019). Premature  
84 deaths due to acute respiratory diseases from such pollutants are estimated to be over to two  
85 millions per year worldwide and 45.000 for Italy (Brunekreef and Holgate, 2002; Huang et al., 2016;  
86 EAA, 2019; Watts et al., 2019).

87 Here, we are providing additional evidence on the possible influence of air quality on the  
88 spread of SARS-CoV-2 in Italian regions. Since the effects of air pollutants on human health not only  
89 depend on their concentrations but also, if not especially, on chronicity of exposure, we have  
90 elaborated the last four years (from 2016 to 2019, EEA, 2020) of regional distribution of NO<sub>2</sub>, PM<sub>2.5</sub>

91 and PM<sub>10</sub> is presented in Figure 2. The highest atmospheric concentrations were clearly distributed  
92 in the Northern areas (Piedmont, Lombardy, Veneto and Emilia-Romagna), in addition to urbanized  
93 cities, such as Rome and Naples.

94 The long-term condition of population exposure is also revealed by the number of days per  
95 year in which the regulatory limits of O<sub>3</sub> and PM<sub>10</sub> are exceeded (Figure 3A-B): the critical situation  
96 of Northern Italy is reflected by values of up to 80 days of exceedance per year (average of the last  
97 three years, EAA, 2019). Worthy to remind, ozone is one of the main precursors for the formation  
98 of NO<sub>2</sub>, and chronic exposure to this contaminant for almost a quarter of a year is undoubtedly of  
99 primary importance. The chronic air pollution in Northern Italy is further represented by the number  
100 of years during the last decade (2010-2019) in which the limit value for PM<sub>10</sub> (50 µg/m<sup>3</sup> per day) has  
101 been exceeded for at least 35 days (Figure 3C). Once again, these data confirm that the whole  
102 Northern area below the Alpine arc has been constantly affected by significantly higher levels of  
103 these contaminants.

104 The hypothesis that atmospheric pollution may influence the SARS-CoV-2 outbreak in Italy  
105 was also tested from the relationships between the confirmed cases of Covid-19 in up to 71 Italian  
106 provinces (updated 6 April) with the corresponding air quality data. The latter were expressed as  
107 average concentrations in the last 4 years of NO<sub>2</sub>, PM<sub>2.5</sub> and PM<sub>10</sub> (Figure 4A-C) and the number of  
108 days exceeding the regulatory limits (averages of the last 3 years) for O<sub>3</sub> and PM<sub>10</sub> (Figure 4D-E). The  
109 always significant correlations provided further evidence on the role that chronic exposure to  
110 atmospheric contamination may have as a favourable context for the spread and virulence of the  
111 SARS-CoV-2 within a population subjected to a higher incidence of respiratory and cardiac  
112 affections.

113 It is well known that exposure to atmospheric contaminants modulate the host's  
114 inflammatory response leading to an overexpression of inflammatory cytokines and chemokines  
115 (Gouda et al., 2018). Clear effects of Milan winter PM<sub>2.5</sub> were observed on elevated production of  
116 interleukin IL-6 and IL-8 in human bronchial cells (Longhin et al., 2018), and also NO<sub>2</sub> was shown to  
117 correlate with IL-6 levels on inflammatory status (Perret et al., 2017). The impairment of  
118 respiratory system and chronic disease by air pollution can thus facilitate viral infection in lower  
119 tracts (Shinya et al., 2006; van Riel et al., 2006).

120 In addition, various studies have reported a direct relationship between the spread and  
121 contagion capacity of some viruses with the atmospheric levels and mobility of air pollutants

122 (Ciencewicky and Jaspers, 2007; Sedlmaier et al., 2009). The avian influenza virus (H5N1) could be  
123 transported across long distances by fine dust during Asian storms (Chen et al., 2010), and  
124 atmospheric levels of PM<sub>2.5</sub>, PM<sub>10</sub>, carbon monoxide, NO<sub>2</sub> and sulphur dioxide were shown to  
125 influence the diffusion of the human respiratory syncytial virus in children (Ye et al., 2016), and the  
126 daily spread of the measles virus in China (Chen et al., 2017; Peng et al., 2020).

127 These evidences and presented elaborations would confirm that the anomalous variability  
128 of the diffusion and virulence of SARS-CoV-2 in Italy could partly depend on the levels of  
129 atmospheric contamination. Although the capability of this coronavirus to bind particulate matters  
130 remains to be established, chronic exposure to atmospheric contamination and related diseases  
131 may represent a risk factor in determining the severity of COVID-19 syndrome and the high  
132 incidence of fatal events (Chen et al., 2020; Conticini et al., 2020; Wang D. et al., 2020; Wu et al.,  
133 2020),.

134 In conclusion, the actual pandemic event is demonstrating that infectious diseases represent  
135 one of the key challenges for human society. Since periodic emergence of viral agents show an  
136 increasing correlation with socio-economic, environmental and ecological factors (Morens et al.,  
137 2004; Jones et al., 2008), adequate programs for controlling and reducing atmospheric and  
138 environmental pollution should be considered as part of an integrated approach for sustainable  
139 development, human health protection and prevention of epidemic spreads.

140

141 **Note:** *A complete description of the origin of the used data and the methods of graphic and statistical*  
142 *processing is included in the Supplementary Materials.*

## References

1. Brunekreef, B., & Holgate, S. T. (2002). Air pollution and health. *The Lancet*, 360(9341), 1233–1242. [https://doi.org/10.1016/s0140-6736\(02\)11274-8](https://doi.org/10.1016/s0140-6736(02)11274-8)
2. Cereda, D., Tirani, M., Rovida, F., Demicheli, V., Ajelli, M., Poletti, P., Trentin, F., Guzzetta, G., Marziano, V., Barone, A., Magoni, M., Deandrea, S., Diurno, G., Lombardo, M., Faccini, M., Pan, A., Bruno, R., Pariani, E., Grasselli, G., Piatti, A., Gramegna, M., Baldanti, F., Melegaro, A., Merler, S. (2020). The early phase of the COVID-19 outbreak in Lombardy, Italy. Arxiv pre-print. <https://arxiv.org/ftp/arxiv/papers/2003/2003.09320.pdf>
3. Chen, G., Zhang, W., Li, S., Williams, G., Liu, C., Morgan, G. G., Jaakkola, J. J. K., & Guo, Y. (2017). Is short-term exposure to ambient fine particles associated with measles incidence in China? A multi-city study. *Environmental Research*, 156, 306–311. <https://doi.org/10.1016/j.envres.2017.03.046>
4. Chen, N., Zhou, M., Dong, X., Qu, J., Gong, F., Han, Y., ... Zhang, L. (2020). Epidemiological and clinical characteristics of 99 cases of 2019 novel coronavirus pneumonia in Wuhan, China: a descriptive study. *The Lancet*, 395(10223), 507–513. [https://doi.org/10.1016/s0140-6736\(20\)30211-7](https://doi.org/10.1016/s0140-6736(20)30211-7)
5. Chen, P.-S., Tsai, F. T., Lin, C. K., Yang, C.-Y., Chan, C.-C., Young, C.-Y., & Lee, C.-H. (2010). Ambient Influenza and Avian Influenza Virus during Dust Storm Days and Background Days. *Environmental Health Perspectives*, 118(9), 1211–1216. <https://doi.org/10.1289/ehp.0901782>
6. Ciencewicki, J., & Jaspers, I. (2007). Air Pollution and Respiratory Viral Infection. *Inhalation Toxicology*, 19(14), 1135–1146. <https://doi.org/10.1080/08958370701665434>
7. Cohen, J., & Kupferschmidt, K. (2020). Countries test tactics in “war” against COVID-19. *Science*, 367(6484), 1287–1288. <https://doi.org/10.1126/science.367.6484.1287>
8. Conticini, E., Frediani, B., & Caro, D. (2020). Can atmospheric pollution be considered a co-factor in extremely high level of SARS-CoV-2 lethality in Northern Italy? *Environmental Pollution*, 114465. <https://doi.org/10.1016/j.envpol.2020.114465>
9. Cucinotta, D., Vanelli, M. (2020). WHO Declares COVID-19 a Pandemic. *Acta Bio Medica*, 91(1), 157–160. <https://doi.org/10.23750/abm.v91i1.9397>
10. ECDC, European Centre for Disease Prevention and Control (European Union Agency), Situation update worldwide, as of 7 April 2020. <https://www.ecdc.europa.eu/en/geographical-distribution-2019-ncov-cases>
11. EEA, European Environmental Agency (2019). Air quality in Europe, Report Number 10/2019.
12. EEA, European Environmental Agency (2020). Monitoring Covid-19 impacts on air pollution. Dashboard Prod-ID: DAS-217-en. <https://www.eea.europa.eu/themes/air/air-quality-and-covid19/monitoring-covid-19-impacts-on>
13. Fanelli, D., & Piazza, F. (2020). Analysis and forecast of COVID-19 spreading in China, Italy and France. *Chaos, Solitons & Fractals*, 134, 109761. <https://doi.org/10.1016/j.chaos.2020.109761>

14. Gouda, M. M., Shaikh, S. B., & Bhandary, Y. P. (2018). Inflammatory and Fibrinolytic System in Acute Respiratory Distress Syndrome. *Lung*, 196(5), 609–616. <https://doi.org/10.1007/s00408-018-0150-6>
15. Huang, L., Zhou, L., Chen, J., Chen, K., Liu, Y., Chen, X., & Tang, F. (2016). Acute effects of air pollution on influenza-like illness in Nanjing, China: A population-based study. *Chemosphere*, 147, 180–187. <https://doi.org/10.1016/j.chemosphere.2015.12.082>
16. ICPD, Italian Civil Protection Department (2020). COVID-19 Monitoring, daily update (accessed 8 April 2020). <https://github.com/pcm-dpc/COVID-19>
17. Jones, K. E., Patel, N. G., Levy, M. A., Storeygard, A., Balk, D., Gittleman, J. L., & Daszak, P. (2008). Global trends in emerging infectious diseases. *Nature*, 451(7181), 990–993. <https://doi.org/10.1038/nature06536>
18. Longhin, E., Holme, J. A., Gualtieri, M., Camatini, M., & Øvrevik, J. (2018). Milan winter fine particulate matter (wPM2.5) induces IL-6 and IL-8 synthesis in human bronchial BEAS-2B cells, but specifically impairs IL-8 release. *Toxicology in Vitro*, 52, 365–373. <https://doi.org/10.1016/j.tiv.2018.07.016>
19. Kampa, M., & Castanas, E. (2008). Human health effects of air pollution. *Environmental Pollution*, 151(2), 362–367. <https://doi.org/10.1016/j.envpol.2007.06.012>
20. Legambiente, Annual Dossier series on Air Quality in Italy (2018, 2019 and 2020). Mal’Aria di città, Dossier 2018, 2019 and 2020, referring the European Environmental Agency (EEA).
21. Li, Q. et al. Early Transmission Dynamics in Wuhan, China, of Novel Coronavirus–Infected Pneumonia. *N. Engl. J. Med.* NEJMoa2001316, <https://doi.org/10.1056/NEJMoa2001316>
22. Morens, D. M., Folkers, G. K., & Fauci, A. S. (2004). The challenge of emerging and re-emerging infectious diseases. *Nature*, 430(6996), 242–249. <https://doi.org/10.1038/nature02759>
23. Peng, L., Zhao, X., Tao, Y., Mi, S., Huang, J., & Zhang, Q. (2020). The effects of air pollution and meteorological factors on measles cases in Lanzhou, China. *Environmental Science and Pollution Research*. <https://doi.org/10.1007/s11356-020-07903-4>
24. Perret, J., Bowatte, G., Lodge, C., Knibbs, L., Gurrin, L., Kandane-Rathnayake, R., Johns, D., Lowe, A., Burgess, J., Thompson, B., Thomas, P., Wood-Baker, R., Morrison, S., Giles, G., Marks, G., Markos, J., Tang, M., Abramson, M., Walters, E., ... Dharmage, S. (2017). The Dose–Response Association between Nitrogen Dioxide Exposure and Serum Interleukin-6 Concentrations. *International Journal of Molecular Sciences*, 18(5), 1015. <https://doi.org/10.3390/ijms18051015>
25. Remuzzi, A., & Remuzzi, G. (2020). COVID-19 and Italy: what next? *The Lancet*, 395(10231), 1225–1228. [https://doi.org/10.1016/s0140-6736\(20\)30627-9](https://doi.org/10.1016/s0140-6736(20)30627-9)
26. Sedlmaier, N., Hoppenheidt, K., Krist, H., Lehmann, S., Lang, H., & Büttner, M. (2009). Generation of avian influenza virus (AIV) contaminated fecal fine particulate matter (PM2.5): Genome and infectivity detection and calculation of immission. *Veterinary Microbiology*, 139(1–2), 156–164. <https://doi.org/10.1016/j.vetmic.2009.05.005>



27. Shinya, K., Ebina, M., Yamada, S., Ono, M., Kasai, N., & Kawaoka, Y. (2006). Influenza virus receptors in the human airway. *Nature*, 440(7083), 435–436. <https://doi.org/10.1038/440435a>
28. Sohrabi, C., Alsafi, Z., O’Neill, N., Khan, M., Kerwan, A., Al-Jabir, A., Losifidis, C., & Agha, R. (2020). World Health Organization declares global emergency: A review of the 2019 novel coronavirus (COVID-19). *International Journal of Surgery*, 76, 71–76. <https://doi.org/10.1016/j.ijisu.2020.02.034>
29. van Riel, D., Munster, V. J., de Wit, E., Rimmelzwaan, G. F., Fouchier, R. A. M., Osterhaus, A. D. M. E., & Kuiken, T. (2006). H5N1 Virus Attachment to Lower Respiratory Tract. *Science*, 312(5772), 399–399. <https://doi.org/10.1126/science.1125548>
30. Wang, D., Hu, B., Hu, C., Zhu, F., Liu, X., Zhang, J., ... Peng, Z. (2020). Clinical Characteristics of 138 Hospitalized Patients With 2019 Novel Coronavirus–Infected Pneumonia in Wuhan, China. *JAMA*, 323(11), 1061. <https://doi.org/10.1001/jama.2020.1585>
31. Wang, T., Du, Z., Zhu, F., Cao, Z., An, Y., Gao, Y., & Jiang, B. (2020). Comorbidities and multi-organ injuries in the treatment of COVID-19. *The Lancet*, 395(10228), e52. [https://doi.org/10.1016/s0140-6736\(20\)30558-4](https://doi.org/10.1016/s0140-6736(20)30558-4)
32. Watts, N., Amann, M., Arnell, N., Ayeb-Karlsson, S., Belesova, K., Boykoff, M., Byass, P., Cai, W., Campbell-Lendrum, D., Capstick, S., Chambers, J., Dalin, C., Daly, M., Dasandi, N., Davies, M., Drummond, P., Dubrow, R., Ebi, K. L., Eckelman, M., ... Montgomery, H. (2019). The 2019 report of The Lancet Countdown on health and climate change: ensuring that the health of a child born today is not defined by a changing climate. *The Lancet*, 394(10211), 1836–1878. [https://doi.org/10.1016/s0140-6736\(19\)32596-6](https://doi.org/10.1016/s0140-6736(19)32596-6)
33. WHO Director, General’s Remarks at the Media Briefing on 2019-nCoV on 11 February 2020 (2020a). <https://www.who.int/dg/speeches/detail/who-director-general-s-remarks-at-the-media-briefing-on-2019-ncov-on-11-february-2020>.
34. WHO Director, General’s opening remarks at the media briefing on COVID19 on 11 March 2020 (2020b). <https://www.who.int/dg/speeches/detail/who-director-general-s-opening-remarks-at-the-media-briefing-on-covid-19---11-march-2020>
35. Wu, F., Zhao, S., Yu, B., Chen, Y.-M., Wang, W., Song, Z.-G., ... Zhang, Y.-Z. (2020). A new coronavirus associated with human respiratory disease in China. *Nature*, 579(7798), 265–269. <https://doi.org/10.1038/s41586-020-2008-3>
36. Xu, B., Gutierrez, B., Mekaru, S., Sewalk, K., Goodwin, L., Loskill, A., Cohn, E. L., Hswen, Y., Hill, S. C., Cobo, M. M., Zarebski, A. E., Li, S., Wu, C.-H., Hulland, E., Morgan, J. D., Wang, L., O’Brien, K., Scarpino, S. V., Brownstein, J. S., ... Kraemer, M. U. G. (2020). Epidemiological data from the COVID-19 outbreak, real-time case information. *Scientific Data*, 7(1). <https://doi.org/10.1038/s41597-020-0448-0>

37. Ye, Q., Fu, J., Mao, J., & Shang, S. (2016). Haze is a risk factor contributing to the rapid spread of respiratory syncytial virus in children. *Environmental Science and Pollution Research*, 23(20), 20178–20185. <https://doi.org/10.1007/s11356-016-7228-6>

### **Legend of the Figures:**

**Figure 1** - Regional distribution of COVID-19 outbreak in Italy (from 24 February to 6 April 2020: A) Abundance of COVID-19 cases (absolute number), chromatic scale between 50 and 5000; B) Percentage rate of positive subjects referred to the number of performed tests (oropharyngeal swabs); C) Percentage of reported mortality rate. Data obtained and re-elaborated from the official daily reports of Italian Civil Protection Department (ICPD, 2020).

**Figure 2** - Regional data on air quality levels: A) nitrogen dioxide (NO<sub>2</sub>); B) particulate matter of 2.5 µm or less (PM<sub>2.5</sub>); C) particulate matter of 2.5-10 µm (PM<sub>10</sub>). Data are referred to the means of values of last four years (2016-2019), expressed as µg/m<sup>3</sup> (obtained and elaborated from the European Environmental Agency, accessed on 6 April, EEA, 2020).

**Figure 3** - Number of days per year exceeding the regulatory limits relating to A) ozone (O<sub>3</sub>) and to B) particulate matter (PM<sub>10</sub>), as average means of the last 3 years (2017-2019); C) number of years in which the PM<sub>10</sub> limit was exceeded for at least 35 days per year, from 2010 to 2019. Data are obtained and elaborated from annual reports (Legambiente, 2018; 2019; 2020) and referred to the official statistics of the European Environmental Agency (EEA, 2019).

**Figure 4** - Statistical correlation between the regional distribution of COVID-19 cases and the air quality parameters in Italy: incidence of COVID-19 cases vs levels of A) NO<sub>2</sub>, B) PM<sub>2.5</sub> and C) PM<sub>10</sub> (four years means); incidence of COVID-19 cases vs number of days exceeding regulatory limits of D) O<sub>3</sub> and E) PM<sub>10</sub> (three years means). Data obtained and elaborated from EEA (2019; 2020), ICPD (2020), and Legambiente (2018; 2019; 2020).

Figure 1.

A) Reported COVID-19 cases

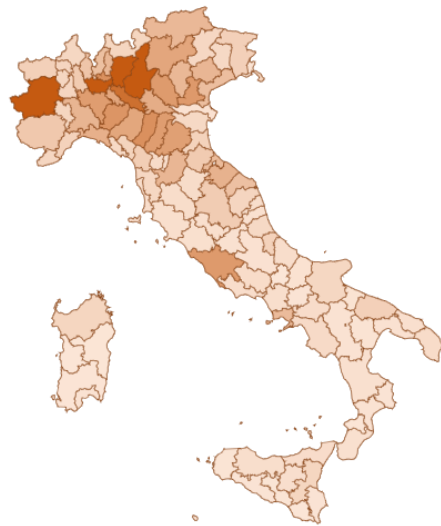

N° cases  
<50      >5000

B) COVID-19 positive test rate

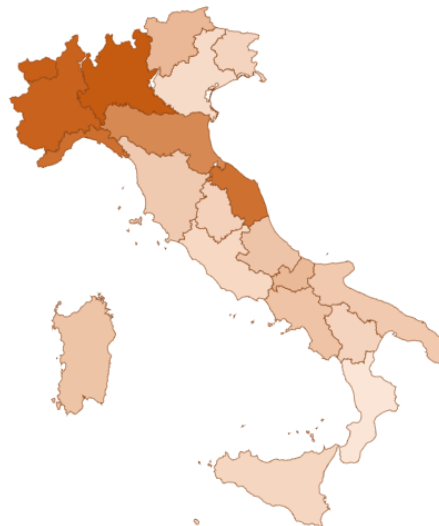

Rate %  
6%      34%

C) COVID-19 death rate

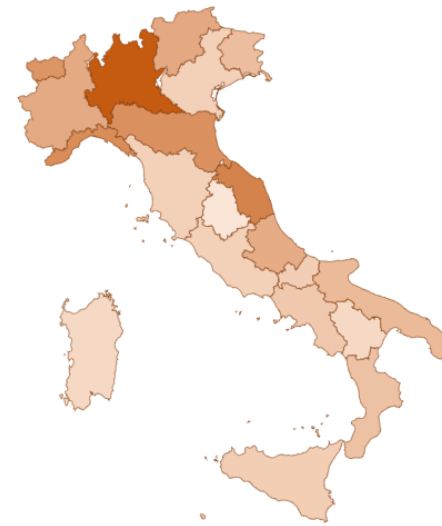

Rate %  
3%      18%

Figure 2.

A) NO<sub>2</sub> mean levels

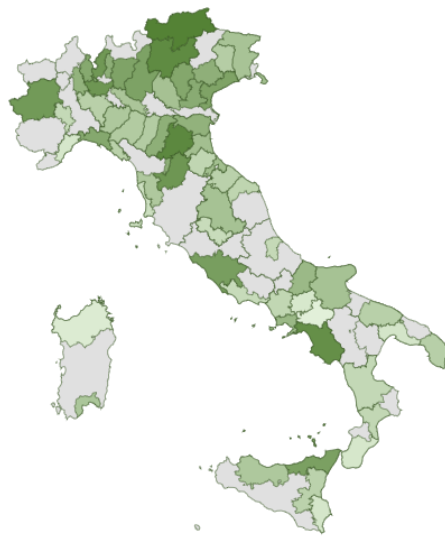

µg/m<sup>3</sup> 17.2 58.9

B) PM<sub>2.5</sub> mean levels

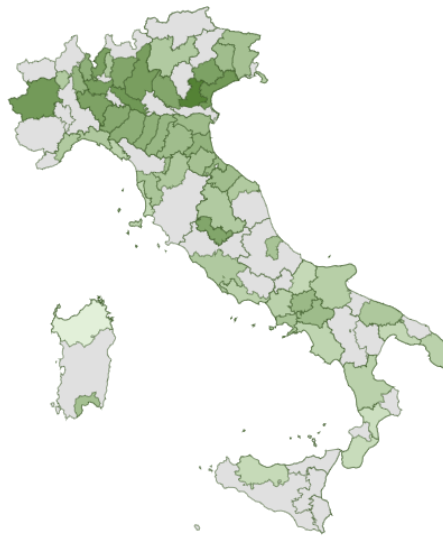

µg/m<sup>3</sup> 5.7 31.5

C) PM<sub>10</sub> mean levels

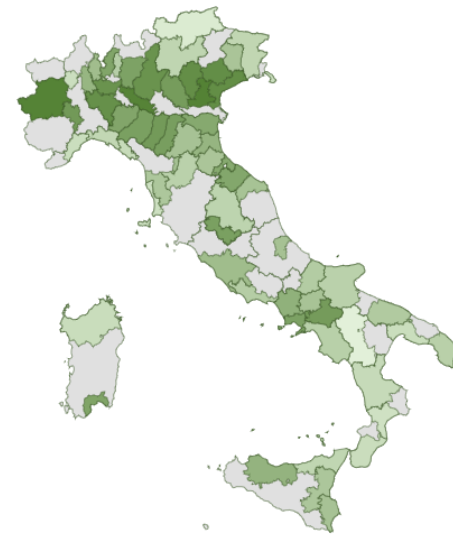

µg/m<sup>3</sup> 16.9 37.7

**Figure 3.**

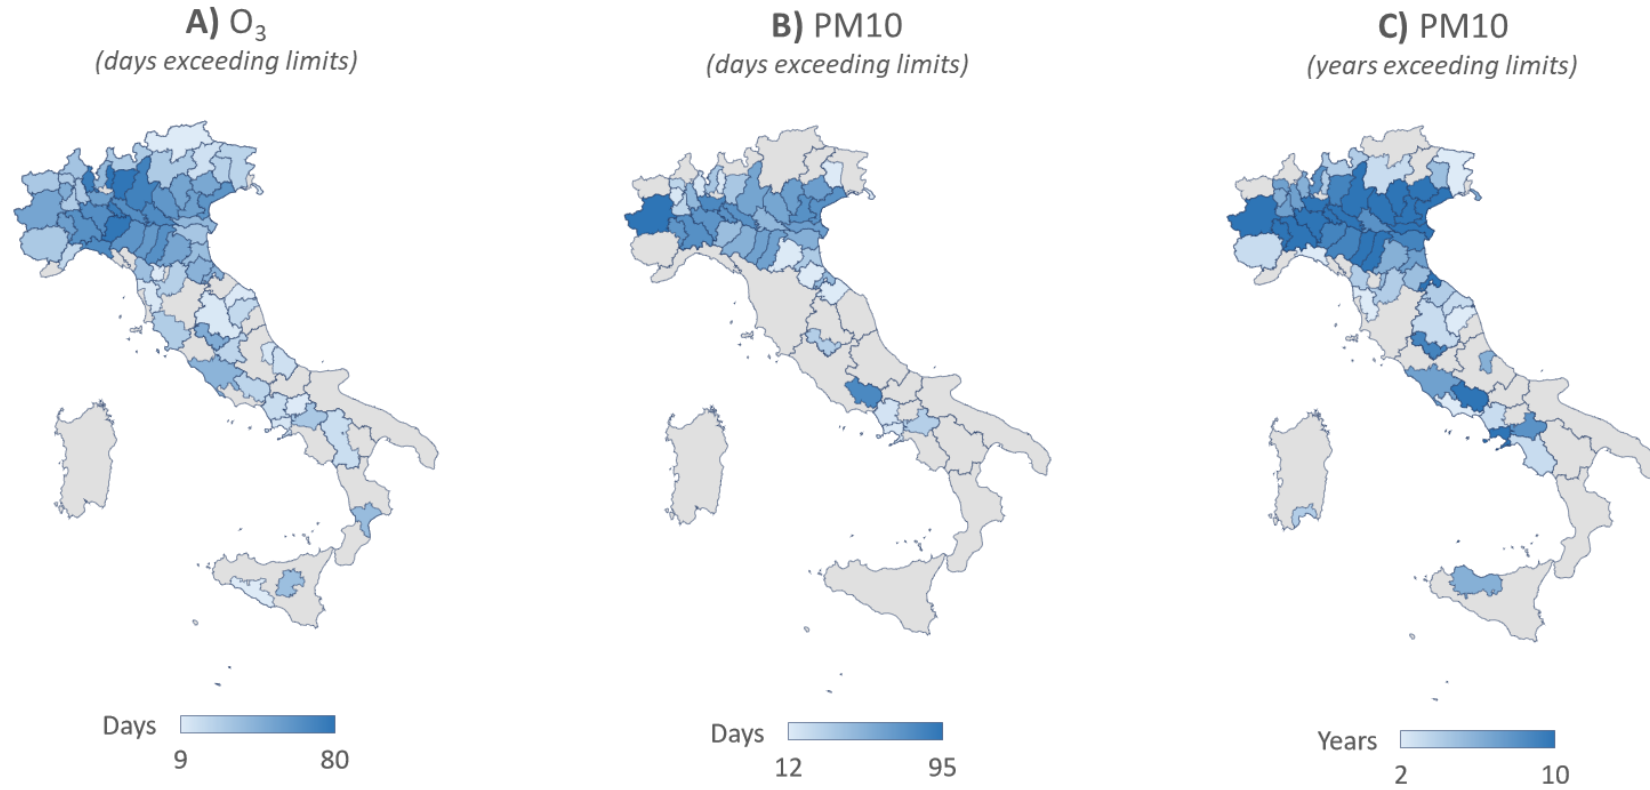

Figure 4.

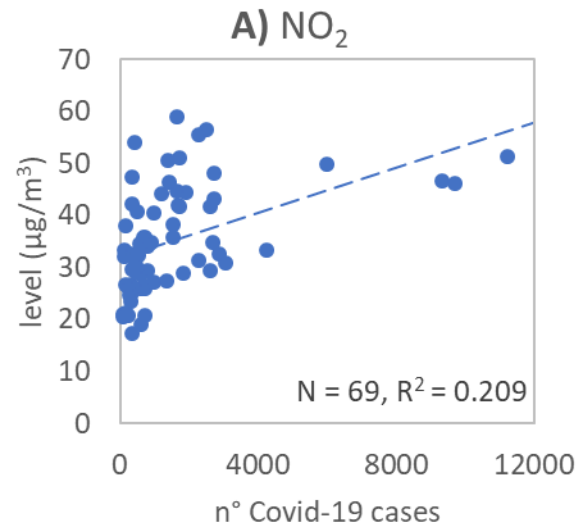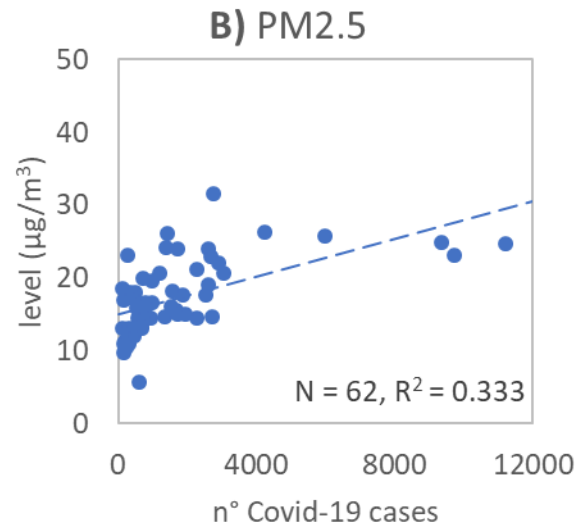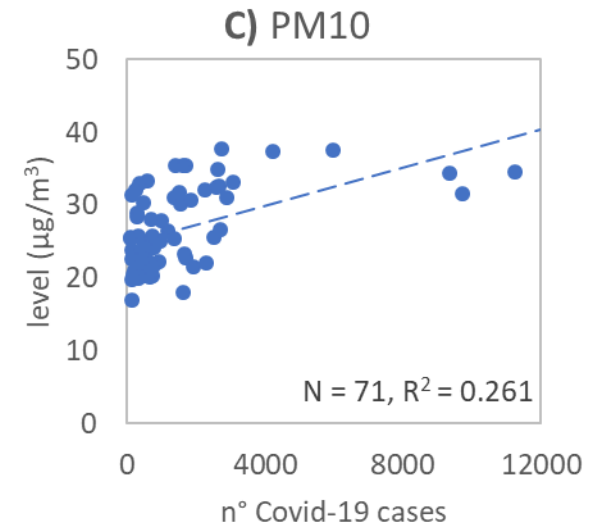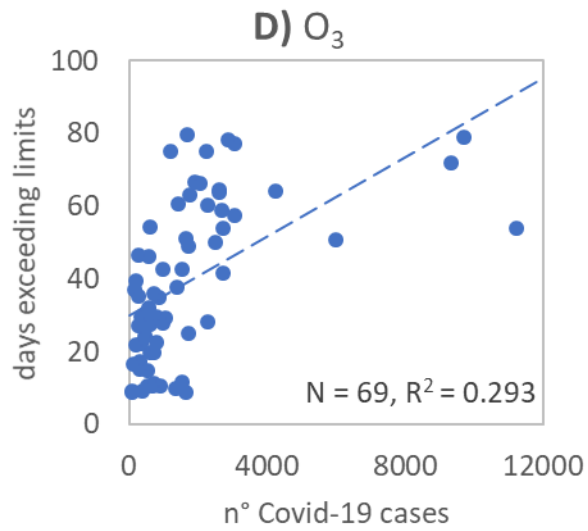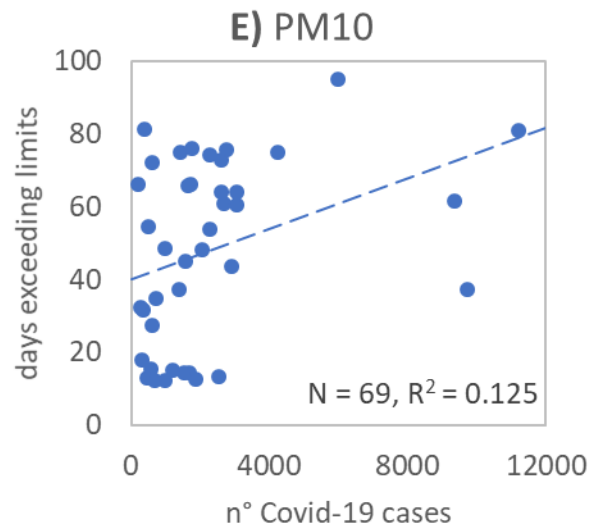

|    | <b>Pearson</b> | <b>Sig.</b> |
|----|----------------|-------------|
| A) | 0.4571         | $p < 0.01$  |
| B) | 0.5775         | $p < 0.01$  |
| C) | 0.5114         | $p < 0.01$  |
| D) | 0.5417         | $p < 0.01$  |
| E) | 0.3541         | $p < 0.05$  |
